# Supplementary material for: Body Mass Index Measured Repeatedly over 42 Years as a Risk Factor for Ischemic Stroke: The HUNT Study
Source: MDPI journal article supplement (doi:10.3390/nu15051232), 2023-02-28
Supplement: s1 [file s1]

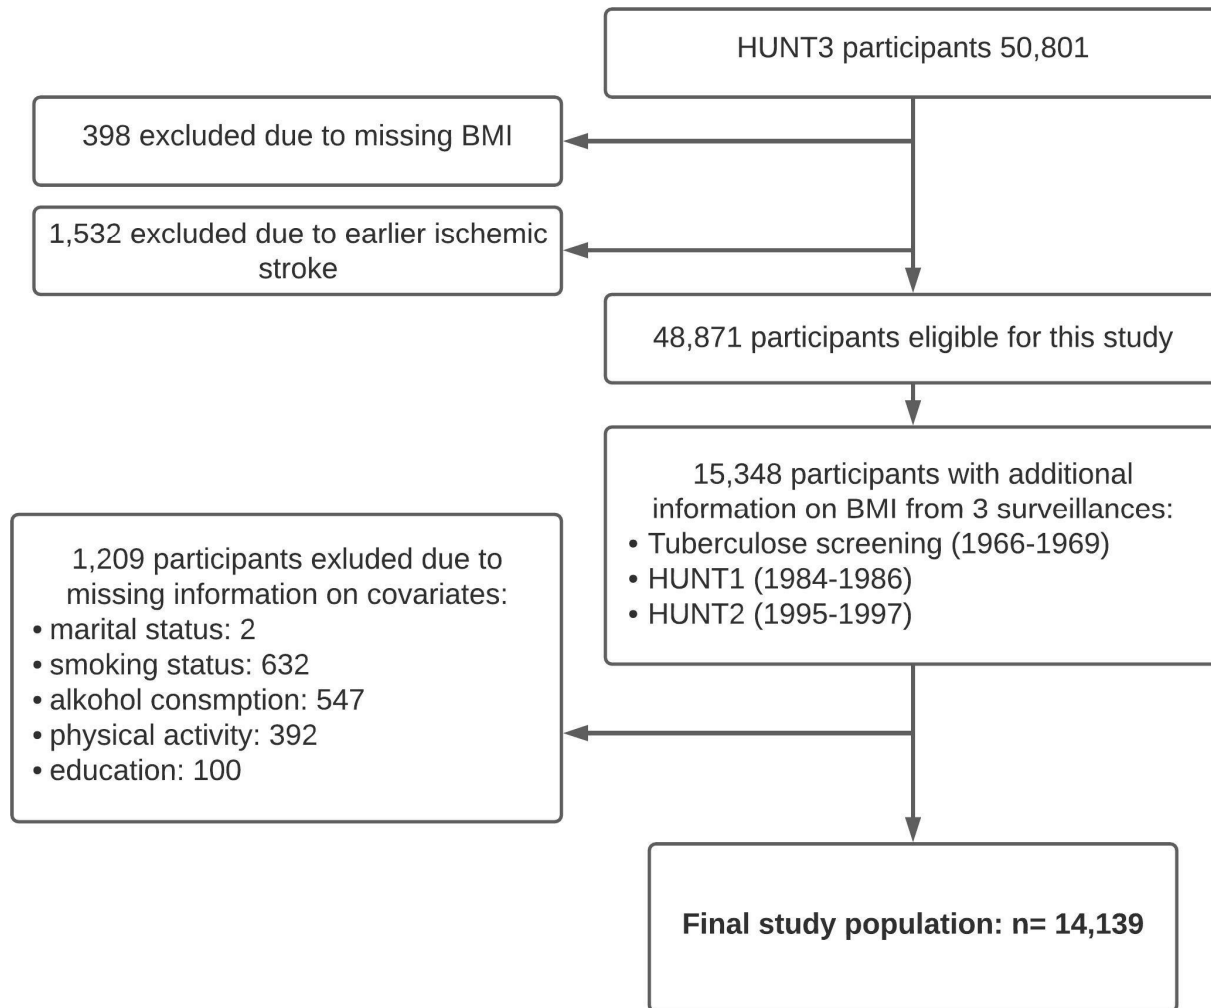

Figure S1: Flowchart of the population. Exclusion criteria due to missing information were not mutually exclusive. HUNT Trøndelag Health Study; BMI Body mass index

Table S1. Hazard Ratios (HRs) of Ischemic Stroke, by Categories of Average Body Mass Index to the end of Follow-up with Repeated Updated Exposure and by Categories of Average Body Mass Index Until the HUNT-3 Measurement (BMI<sub>07</sub>).

| Mean BMI<br>(kg/m <sup>2</sup> )                                                          | N      | Events | Person<br>years | HR <sup>s</sup> | 95% CI    | HR <sup>#</sup> | 95% CI    |
|-------------------------------------------------------------------------------------------|--------|--------|-----------------|-----------------|-----------|-----------------|-----------|
|                                                                                           | 14 139 | 856    | 152 843         |                 |           |                 |           |
| Average BMI from BMI <sub>67</sub> to the end of follow up with repeated updated exposure |        |        |                 |                 |           |                 |           |
| <18.5                                                                                     | 36     | 1      | 405             | 0.55            | 0.08-3.90 | 0.58            | 0.08-4.12 |
| 18.5-<25                                                                                  | 7 182  | 363    | 78 735          | 1               | (Ref)     | 1               | (Ref)     |
| 25-29.9                                                                                   | 5 895  | 420    | 62 756          | 1.23            | 1.06-1.42 | 1.16            | 1.00-1.35 |
| ≥30                                                                                       | 1 026  | 72     | 10 947          | 1.22            | 0.94-1.58 | 1.06            | 0.80-1.39 |
| Mean BMI<br>(kg/m <sup>2</sup> )                                                          | N      | Events | Person<br>years | HR <sup>s</sup> | 95% CI    | HR <sup>#</sup> | 95% CI    |
| Average BMI from BMI <sub>67</sub> to baseline HUNT-3                                     |        |        |                 |                 |           |                 |           |
| <18.5                                                                                     | 65     | 1      | 742             | 0.41            | 0.06-2.95 | 0.43            | 0.06-3.08 |
| 18.5-<25                                                                                  | 8 477  | 401    | 93 931          | 1               | (Ref)     | 1               | (Ref)     |
| 25-29.9                                                                                   | 4 865  | 393    | 50 683          | 1.29            | 1.11-1.48 | 1.23            | 1.06-1.42 |
| ≥30                                                                                       | 732    | 61     | 7 487           | 1.27            | 0.96-1.67 | 1.10            | 0.82-1.47 |

N: number of participants within each category; HR: hazard ratio; CI: confidence interval.

§ Adjusted for age at baseline (continuous), sex, smoking status (never, former, current), education (lower secondary education, upper secondary education, tertiary education), marital status (unmarried, married/cohabitant, widowed/divorced/separated), physical activity (inactive, active), alcohol consumption (abstain, light drinkers, moderate drinkers, heavy drinkers) and chronic diseases (number of chronic diseases). Same as Model 2 in Table 2.

# Adjustments as above and additionally for hypertension (Yes/No) defined by increased blood pressure or use of antihypertensive medication, diabetes (Yes/NO) defined by increased non fastening glucose or use of diabetes medication, triglycerides as continuous variable and HDL pathological reduced (Yes/No).

Table S2. Characteristics of Participants of the Three Group Based Trajectories of repeated BMI Measurement.

|                                        | Constantly<br>Normal Weight<br>Group<br>n= 6 900 | Developing<br>Overweight<br>Group<br>n= 6 149 | Developing<br>Obesity<br>Group<br>n= 1 090 |
|----------------------------------------|--------------------------------------------------|-----------------------------------------------|--------------------------------------------|
| Age at HUNT3 (years)                   | 65.0 (9.4)                                       | 67.4 (9.2)                                    | 67.8 (8.7)                                 |
| Women, n (%)                           | 4 077 (59.1)                                     | 3 027 (49.2)                                  | 734 (67.3)                                 |
| BMI <sub>67</sub> (kg/m <sup>2</sup> ) | 21.5 (2.2)                                       | 24.2 (2.5)                                    | 28.2 (3.7)                                 |
| BMI <sub>85</sub> (kg/m <sup>2</sup> ) | 22.3 (1.8)                                       | 26.1 (1.9)                                    | 31.5 (3.2)                                 |
| BMI <sub>96</sub> (kg/m <sup>2</sup> ) | 23.9 (1.9)                                       | 28.4 (1.9)                                    | 34.7 (3.2)                                 |
| BMI <sub>07</sub> (kg/m <sup>2</sup> ) | 24.6 (2.3)                                       | 29.5 (2.4)                                    | 35.9 (3.7)                                 |
| SBP (mmHg)                             | 134.9 (19.5)                                     | 139.9 (19.1)                                  | 140.9 (18.9)                               |
| DBP (mmHg)                             | 74.2 (11.2)                                      | 76.5 (11.5)                                   | 74.9 (11.0)                                |
| Hypertension, n (%)                    | 4 566 (66.2)                                     | 4 985 (81.1)                                  | 999 (91.7)                                 |
| Diabetes mellitus, n (%)               | 220 (3.2)                                        | 571 (9.3)                                     | 227 (20.8)                                 |
| Total cholesterol (mmol/L)             | 5.9 (1.1)                                        | 5.7 (1.1)                                     | 5.5 (1.1)                                  |
| HDL cholesterol (mmol/L)               | 1.5 (0.4)                                        | 1.3 (0.9)                                     | 1.2 (0.3)                                  |
| Triglycerides (mmol/L)                 | 1.5 (0.8)                                        | 1.9 (1.0)                                     | 2.1 (1.2)                                  |
| Smoking status                         |                                                  |                                               |                                            |
| Never, n (%)                           | 2 623 (38.0)                                     | 2 415 (39.3)                                  | 490 (45.0)                                 |
| Former, n (%)                          | 2 647 (38.4)                                     | 2 602 (42.3)                                  | 432 (39.6)                                 |
| Occasionally, n (%)                    | 355 (5.1)                                        | 343 (5.6)                                     | 50 (4.6)                                   |
| Current, n (%)                         | 1 275 (18.5)                                     | 789 (12.8)                                    | 118 (10.8)                                 |
| Alcohol consumption                    |                                                  |                                               |                                            |
| Abstainers, n (%)                      | 1 509 (21.9)                                     | 1 624 (26.4)                                  | 393 (36.1)                                 |
| Light drinkers, n (%)                  | 3 853 (55.9)                                     | 3 404 (55.4)                                  | 553 (50.7)                                 |
| Moderate drinkers, n (%)               | 1 424 (20.6)                                     | 1 031 (16.8)                                  | 134 (12.3)                                 |
| Heavy drinkers, n (%)                  | 114 (1.7)                                        | 90 (1.5)                                      | 10 (0.9)                                   |
| Education                              |                                                  |                                               |                                            |
| Lower secondary, n (%)                 | 2 766 (40.1)                                     | 2 848 (46.3)                                  | 628 (57.6)                                 |
| Upper secondary, n (%)                 | 2 863 (41.5)                                     | 2 423 (39.4)                                  | 351 (32.2)                                 |
| Tertiary, n (%)                        | 1 271 (18.4)                                     | 878 (14.3)                                    | 111 (10.2)                                 |
| Physical inactivity                    |                                                  |                                               |                                            |
| Inactive, n (%)                        | 1 140 (16.5)                                     | 1 342 (21.8)                                  | 359 (32.8)                                 |
| Active, n (%)                          | 5 760 (83.5)                                     | 4 807 (78.2)                                  | 732 (67.2)                                 |
| Marital Status                         |                                                  |                                               |                                            |
| Single, n (%)                          | 407 (5.9)                                        | 302 (4.9)                                     | 73 (6.7)                                   |
| Married, Cohabitant, n (%)             | 4 879 (70.7)                                     | 4 271 (71.1)                                  | 712 (65.3)                                 |
| Widow, Divorced, Separated, n (%)      | 1 614 (23.4)                                     | 1 476 (24.0)                                  | 305 (28.0)                                 |

Values are presented as mean ± standard deviation or number (percentages). BMI body mass index, SBP systolic blood pressure, DBP diastolic blood pressure, HDL high-density lipoprotein. Not indicated number of missing.

Table S3. Hazard Ratios (HRs) of Ischemic Stroke, by Categories of Average Body Mass Index to the End of Follow-up with Repeated Updated Exposure, Stratified for Sex, Age at Baseline (<65 years and ≥65 years) and Smoking Status

| BMI<br>(kg/m <sup>2</sup> ) | Women                    |                   |                           |      |           | Men          |                   |                           |      |           | p for interaction |
|-----------------------------|--------------------------|-------------------|---------------------------|------|-----------|--------------|-------------------|---------------------------|------|-----------|-------------------|
|                             | N<br>7,838               | Event<br>s<br>417 | Person<br>years<br>86,404 | HR   | 95% CI    | N<br>6,301   | Event<br>s<br>439 | Person<br>years<br>66,439 | HR   | 96% CI    |                   |
| <18.5                       | 28                       | 1                 | 410                       | 0.81 | 0.11-5.76 | 8            | 0                 | 108                       | -    |           | -                 |
| 18.5-<25                    | 4,215                    | 194               | 50,124                    | 1    | (Ref)     | 2,960        | 169               | 34,449                    | 1    | (Ref)     | (Ref)             |
| 25-29.9                     | 2,896                    | 173               | 29,194                    | 1.07 | 0.86-1.32 | 3,005        | 247               | 29,031                    | 1.37 | 1.12-1.66 | 0.209             |
| ≥30                         | 699                      | 49                | 6,676                     | 1.11 | 0.80-1.54 | 328          | 23                | 2,852                     | 1.26 | 0.81-1.96 | 0.899             |
| BMI<br>(kg/m <sup>2</sup> ) | <65 years                |                   |                           |      |           | ≥65 years    |                   |                           |      |           |                   |
|                             | N<br>6,972               | Event<br>s<br>205 | Person<br>years<br>81,024 | HR   | 95% CI    | N<br>7,167   | Event<br>s<br>651 | Person<br>years<br>71,816 | HR   | 96% CI    |                   |
| <18.5                       | 25                       | 1                 | 393                       | 1.23 | 0.17-8.83 | 11           | 0                 | 125                       | -    |           | -                 |
| 18.5-<25                    | 4,118                    | 108               | 51,671                    | 1    | (Ref)     | 3,057        | 255               | 32,902                    | 1    | (Ref)     | (Ref)             |
| 25-29.9                     | 2,465                    | 86                | 25,537                    | 1.40 | 1.05-1.87 | 3,436        | 334               | 32,687                    | 1.26 | 1.07-1.48 | 0.280             |
| ≥30                         | 364                      | 10                | 3,427                     | 1.22 | 0.63-2.35 | 663          | 62                | 6,101                     | 1.24 | 0.93-1.64 | 0.885             |
| BMI<br>(kg/m <sup>2</sup> ) | Former or Current Smoker |                   |                           |      |           | Never Smoker |                   |                           |      |           |                   |
|                             | N<br>8,611               | Event<br>s<br>536 | Person<br>years<br>92,095 | HR   | 95% CI    | N<br>5,528   | Event<br>s<br>320 | Person<br>years<br>60,748 | HR   | 96% CI    |                   |
| <18.5                       | 25                       | 1                 | 352                       | 0.76 | 0.11-5.43 | 11           | 0                 | 165                       | -    | -         | -                 |
| 18.5-<25                    | 4,487                    | 240               | 52,232                    | 1    | (Ref)     | 2,688        | 123               | 32,341                    | 1    | (Ref)     | (Ref)             |
| 25-29.9                     | 3,559                    | 261               | 34,523                    | 1.19 | 0.99-1.42 | 2,342        | 159               | 23,702                    | 1.25 | 0.98-1.59 | 0.492             |

|     |     |    |       |      |           |     |    |       |      |           |       |
|-----|-----|----|-------|------|-----------|-----|----|-------|------|-----------|-------|
| ≥30 | 540 | 34 | 4,988 | 1.09 | 0.76-1.57 | 487 | 38 | 4,540 | 1.29 | 0.89-1.88 | 0.309 |
|-----|-----|----|-------|------|-----------|-----|----|-------|------|-----------|-------|

N: total numbers within each category; HR: hazard ratio; CI: confidence interval.

Adjusted for sex, age at baseline, smoking status (never, former, current), education (lower secondary education, upper secondary education, tertiary education), marital status (unmarried, married/cohabitant, widowed/divorced/separated), physical activity (inactive, active), alcohol consumption (abstain, light drinkers, moderate drinkers, heavy drinkers) and chronic diseases (number of chronic diseases) (as in Model 2, Table 2).

Table S4: Hazard Ratios (HRs) of Ischemic Stroke, by Categories of Body Mass Index, for BMI Groups Separately for each Examination (Tbc-screening, HUNT1, 2, 3) and by Categories of Body Mass Index Change in the Whole, Early, Middle and Late Period.

| BMI<br>(kg/m <sup>2</sup> ) | <u>Tbc screening</u> |      |           | <u>HUNT1</u> |      |           | <u>HUNT2</u> |      |           | <u>HUNT3</u> |      |           |
|-----------------------------|----------------------|------|-----------|--------------|------|-----------|--------------|------|-----------|--------------|------|-----------|
|                             | N (Events)           | HR   | 95%CI     | N (Events)   | HR   | 95%CI     | N (Events)   | HR   | 95%CI     | N (Events)   | HR   | 95%CI     |
| <18.5                       | 243 (9)              | 1.0  | 0.52-1.96 | 144 (1)      | 0.21 | 0.03-1.48 | 47 (4)       | 1.53 | 0.57-4.11 | 75 (4)       | 0.80 | 0.30-2.17 |
| 18.5-<25                    | 10 257 (526)         | 1    | (Ref.)    | 8 157 (391)  | 1    | (Ref.)    | 4 799 (241)  | 1    | (Ref.)    | 3 752 (213)  | 1    | (Ref.)    |
| 25-29.9                     | 3 222 (281)          | 1.27 | 1.09-1.47 | 4 905 (391)  | 1.31 | 1.13-1.51 | 6 922 (436)  | 1.10 | 0.94-1.29 | 6 768 (401)  | 1.01 | 0.85-1.19 |
| ≥30                         | 417 (40)             | 1.33 | 0.96-1.84 | 933 (73)     | 1.29 | 1.00-1.66 | 2 371 (175)  | 1.29 | 1.05-1.57 | 3 544 (238)  | 1.17 | 0.97-1.42 |

  

| BMI change<br>in kg/m <sup>2</sup> | <u>Whole period (1967-2007)</u> |      |           | <u>Early period (1967-1985)</u> |      |           | <u>Middle period (1985-1996)</u> |      |           | <u>Late period (1996-2007)</u> |      |           |
|------------------------------------|---------------------------------|------|-----------|---------------------------------|------|-----------|----------------------------------|------|-----------|--------------------------------|------|-----------|
|                                    | N(Events)                       | HR   | 95%CI     | N(Events)                       | HR   | 95%CI     | N(Events)                        | HR   | 95%CI     | N(Events)                      | HR   | 95%CI     |
| <-2.5                              | 28(3)                           | 1.47 | 0.47-4.63 | 528(25)                         | 0.77 | 0.52-1.16 | 150(10)                          | 0.97 | 0.52-1.83 | 789(73)                        | 1.34 | 1.03-1.75 |
| ≥-2.5 to <2.5                      | 11 111(727)                     | 1    | (Ref.)    | 9 354(616)                      | 1    | (Ref.)    | 8 769(559)                       | 1    | (Ref.)    | 10 459(642)                    | 1    | (Ref.)    |
| ≥2.5                               | 3 000(126)                      | 1.02 | 0.82-1.26 | 4 257(215)                      | 1.03 | 0.88-1.21 | 5 220(287)                       | 1.16 | 0.98-1.37 | 2 891(141)                     | 0.96 | 0.78-1.19 |

N: total number within each category; HR: hazard ratio; CI: confidence interval.

Adjusted for sex, age at baseline (continuous), smoking status (never, former, current), education (lower secondary education, upper secondary education, tertiary education), marital status (unmarried, married/cohabitant, widowed/divorced/separated), physical activity (inactive, moderate, vigorous), alcohol consumption (abstainer, light drinker, moderate drinker, heavy drinker) and chronic diseases (number of chronic diseases) (model 2).

## File S1. Supplementary material-BMI trajectory modelling

### Group based trajectory modelling (GBTM)

Group based trajectory modelling (GBTM)<sup>39</sup> is a specialized tool for analyzing developmental trajectories over time.<sup>40, 41</sup> This method has shown to be suitable for identifying underlying longitudinal trajectories.<sup>42</sup>

We used the The Traj Stata Plugin from Carnegie Mellon University ([www.andrew.cmu.edu/user/bjones/traj](http://www.andrew.cmu.edu/user/bjones/traj)) to estimate group-based trajectory models.<sup>19</sup> This Traj Plugin allows calculation of the probability of group membership, predict the trajectory for each group and the posterior probabilities of group membership. To model the BMI trajectories we used the censored normal distribution which is designed to analysis repeatedly measured continuous variables.<sup>43</sup>

For model selection we used the Bayesian information criteria.<sup>19</sup> In addition was the model chosen by iterative estimation<sup>41</sup> of the parsimony of the model which fitted the data well, adequate correspondence between the proportion of sample numbers and estimated probability in each group based on the maximum posterior probability assignment rule. The odds of correct classification based on the posterior probabilities of group membership >5 for each group (the shape/order of each trajectory group) and an average posterior probability value >0.7 for each group. In addition was it necessary that the identified trajectories fulfilled scientific evident biological plausibility.

### Procedure of identifying BMI trajectories by using group-based trajectory modelling (GBTM)

We started with initially 2 groups, testing different orders (i.e., zero-order, linear and quadratic) for the trajectory shapes and increased the number of groups up to 5 until the best fitting model was established.

The 3-group model with one quadratic and two linear trajectories (2 1 1) was chosen based on the model selection criterion. The model had an adequate proportion and sample number in each group: “normal weight” 48.8%, “developing overweight” 43.4%, and “developing obese” 7.8% (Figure S3). The average posterior probability (AvePP) value was 0.93 or more for each group; larger than the recommended minimum AvePP value of 0.70 (GBTM-Table 2). The odds of correct classification were over 5.0 for all three groups, indicating the model had good assignment accuracy (GBTM-Table 2). And there was close correspondence between estimated probability and the proportion of study members assigned to it in each group (GBTM-Table 3).

| GBTM-Table 1. Bayesian information for body mass index (BMI) group-based trajectory modeling (GBTM) group according to number of groups and trajectory shapes |                                                                    |                             |                             |
|---------------------------------------------------------------------------------------------------------------------------------------------------------------|--------------------------------------------------------------------|-----------------------------|-----------------------------|
| Number of groups                                                                                                                                              | Trajectory shape <sup>1</sup> (percent participants in each group) | BIC <sup>2</sup> (n=56,556) | BIC <sup>3</sup> (n=14,139) |
| 2                                                                                                                                                             | 00* (77.9, 22.1)                                                   | -152,929                    | -152,926                    |
| 2                                                                                                                                                             | 01* (59.9, 40.1)                                                   | -147,407                    | -147,404                    |
| 2                                                                                                                                                             | 02* (55.5, 44.5)                                                   | -147,371                    | -147,367                    |
| 2                                                                                                                                                             | 11* (73.6, 26.4)                                                   | -143,074                    | -143,070                    |
| 2                                                                                                                                                             | 12 (71.6, 28.4)                                                    | -143,882                    | -143,877                    |
| 2                                                                                                                                                             | 22 (63.3, 34.7)                                                    | -147,328                    | -147,322                    |
| 3                                                                                                                                                             | 000 (27.9, 48.5, 23.6)                                             | -153,403                    | -153,399                    |
| 3                                                                                                                                                             | 001 (16.8, 54.2, 29.0)                                             | -146,743                    | -146,739                    |
| 3                                                                                                                                                             | 010 (33.5, 50.4, 16.0)                                             | -150,659                    | -150,655                    |
| 3                                                                                                                                                             | 011 (25.3, 60.7, 14.0)                                             | -140,127                    | -140,122                    |
| 3                                                                                                                                                             | 012(32.5,52.5,15.0)                                                | -144,961                    | -144,955                    |
| 3                                                                                                                                                             | 002(25.2,56.8,18.0)                                                | -148,663                    | -148,657                    |
| 3                                                                                                                                                             | 111 (55.1, 23.1, 6.7)                                              | -140,224                    | -140,184                    |
| 3                                                                                                                                                             | 112 (55.2, 33.9, 8.9)                                              | -144,335                    | -144,328                    |
| 3                                                                                                                                                             | 121 (57.2, 33.9, 8.9)                                              | -143,200                    | -143,193                    |
| 3                                                                                                                                                             | 122 (39.3, 49.7, 11.0)                                             | -143,507                    | -143,500                    |
| 3                                                                                                                                                             | 210 (48.8, 45.3, 5.9)                                              | -144,347                    | -144,341                    |
| 3                                                                                                                                                             | 211 (48.8, 43.4, 7.8)                                              | -139,963                    | -139,956                    |
| 3                                                                                                                                                             | 212 (49.0, 35.8, 15.2)                                             | -152,312                    | -152,305                    |
| 3                                                                                                                                                             | 221 (46.9, 41.6, 11.5)                                             | -147,422                    | -147,415                    |
| 3                                                                                                                                                             | 222 (38.3, 50.5, 11.2)                                             | -142,888                    | -142,834                    |
| 4                                                                                                                                                             | 0000* (38.2, 47.8, 12.3, 1.7)                                      | -150,397                    | -150,391                    |
| 4                                                                                                                                                             | 1111* (48.0, 27.7, 20.3, 4.0)                                      | -136,252                    | -136,243                    |
| 4                                                                                                                                                             | 1112* (47.2, 39.8, 11.9, 1.1)                                      | -140,223                    | -140,214                    |
| 4                                                                                                                                                             | 1121* (32.2, 15.5, 49.6, 2.7)                                      | -136,831                    | -136,822                    |
| 4                                                                                                                                                             | 1122* (25.3, 48.8, 21.7, 4.2)                                      | -138,425                    | -138,416                    |
| 4                                                                                                                                                             | 1211* (39.8, 32.8, 18.3, 3.1)                                      | -139,542                    | -139,538                    |
| 4                                                                                                                                                             | 1221* (28.1, 47.8, 20.1, 4.0)                                      | -136,245                    | -136,235                    |
| 4                                                                                                                                                             | 1212* (40.2, 37.0, 15.6, 7.2)                                      | -141,631                    | -141,621                    |
| 4                                                                                                                                                             | 1222*(36.4, 32.8, 21.7, 9.0)                                       | -151,845                    | -151,835                    |
| 4                                                                                                                                                             | 2222(31.1, 29.9, 25.2, 13.8)                                       | -151,006                    | -150,934                    |
| 5                                                                                                                                                             | 00000* (24.5,48.7,21.0,5.2,0.6)                                    | -150,184                    | -150,177                    |



|                                                                                                                                                                                                                                                                                                                                                                                                            |                                 |          |          |
|------------------------------------------------------------------------------------------------------------------------------------------------------------------------------------------------------------------------------------------------------------------------------------------------------------------------------------------------------------------------------------------------------------|---------------------------------|----------|----------|
| 5                                                                                                                                                                                                                                                                                                                                                                                                          | 11111* (18.8,28.0,43.0,8.6,1.5) | -135,116 | -135,106 |
| <sup>1</sup> Trajectory shape; 0=zero-order; 1= linear; 2=quadratic.<br><sup>2</sup> BIC = Bayesian information criterion (for total number of participants)<br><sup>3</sup> BIC = Bayesian information criterion (for total number of observations)<br>* (One or more of the groups have a very small proportion of observations, i.e., less than 5%); Variance matrix is nonsymmetric or highly singular |                                 |          |          |

GBTM-Table 2. Average posterior probability (AvePP) value and odds of correct classification for BMI GBTM groups

| BMI GBTM groups                     |               |                       |                  |
|-------------------------------------|---------------|-----------------------|------------------|
|                                     | Normal weight | Developing Overweight | Developing Obese |
| Average posterior probability value | 0.95          | 0.93                  | 0.95             |
| Odds of correct classification      | 19.70         | 18.01                 | 243.37           |

GBTM-Table 3. Body mass index trajectory groups' estimated probability and the proportion of study members classified to each group according to the maximum posterior probability assignment rule

| BMI GBTM groups                                                                             |               |                       |                  |
|---------------------------------------------------------------------------------------------|---------------|-----------------------|------------------|
|                                                                                             | Normal weight | Developing Overweight | Developing Obese |
| Estimated group probability                                                                 | 48.8          | 43.5                  | 7.7              |
| Proportion assigned to group according to the maximum posterior probability assignment rule | 48.8          | 43.4                  | 7.8              |
